# Supplementary material for: Plasma Extracellular Vesicle Long RNA Profiles in the Diagnosis and Prediction of Treatment Response for Breast Cancer
Source: Research Square preprint supplement (doi:10.21203/rs.3.rs-111007/v1), 2020-11-20
Supplement: Supplementary file 1 [file cb2cf9267833ff8fe63bcd8d.docx]

| **Table S1. Characteristics of the markers for BC detection identified in training set.** | | | | |
| --- | --- | --- | --- | --- |
| **Gene** | **Type** | **P (wilcox test)** | **Fold change (mean)** | **Fold change (median)** |
| BEX2 (DEG in TCGA BC) | Protein coding | 0.000310028 | 1.551658348 | 1.630823933 |
| AC104843.1 | Processed pseudogene | 1.46E-05 | 1.9550703 | 2.181653303 |
| AL136981.2 | Unprocessed pseudogene | 0.000206439 | 1.606567296 | 3.475874025 |
| KRT19 | Protein coding | 6.51E-05 | 2.549444982 | 11.3287037 |
| NPM1P25 | Processed pseudogene | 0.000357388 | 1.216086475 | 4.044264819 |
| CTSG | Protein coding | 0.000410313 | 1.872959802 | 5.614639397 |
| CBR3 | Protein coding | 8.25E-05 | 1.651809737 | 2.903473492 |
| HOXB7 | Protein coding | 0.000166308 | 1.524901639 | 1.636319099 |
| AL691447.3 | Processed pseudogene | 1.82E-05 | 1.78739331 | 2.080022052 |
| RNA5SP141 | rRNA pseudogene | 5.56E-05 | 1.892021691 | Infinity |
| chr13_42953948_42970670_- | circRNA | 0.000460577 | 1.688474834 | 2.761911793 |
| Abbreviations: DEG, differentially expressed gene; TCGA, the Cancer Genome Atlas. | | | | |

| **Table S2. Relationship between MSMO1 expression and clinicopathological features in 291 primary BC patients.** | | | | | |
| --- | --- | --- | --- | --- | --- |
| **Characteristics** | **Low (%)** |  | | **High (%)** | ***p*-value** |
| **n=153** |  | **n=138** | |
| **Age(years)** |  |  |  | | 0.104 |
| ≤ 45 | 36 (23.5) |  | 35 (25.4) | |  |
| ＞45 and ≤ 60 | 86 (56.2) |  | 62 (44.9) | |  |
| ＞60 | 31 (20.3) |  | 41 (29.7) | |  |
| **Menopausal status*** |  |  |  | | 0.766 |
| Pre | 63 (41.2) |  | 52 (37.7) | |  |
| Post | 87 (56.9) |  | 84 (60.9) | |  |
| **Grade*** |  |  |  | | 0.763 |
| G1/2 | 90 (58.8) |  | 81 (58.7) | |  |
| G3 | 51 (33.3) |  | 49 (35.5) | |  |
| **pT stage*** |  |  |  | | 0.692 |
| T1 | 56 (36.6) |  | 46 (33.3) | |  |
| T2/3 | 96 (62.7) |  | 90 (65.2) | |  |
| **pN stage** |  |  |  | | 0.854 |
| N0 | 64 (41.8) |  | 61 (44.2) | |  |
| N1 | 50 (32.7) |  | 39 (28.3) | |  |
| N2 | 16 (10.5) |  | 17 (12.3) | |  |
| N3 | 23 (15.0) |  | 21 (15.2) | |  |
| **LVI*** |  |  |  | | 0.307 |
| Negative | 85 (55.6) |  | 65 (47.1) | |  |
| Positive | 65 (42.5) |  | 71 (51.4) | |  |
| **ER status*** |  |  |  | | 0.590 |
| Negative | 45 (29.4) |  | 38 (27.5) | |  |
| Positive | 107 (69.9) |  | 100 (72.5) | |  |
| **PR status*** |  |  |  | | 0.403 |
| Negative | 34 (22.2) |  | 25 (18.1) | |  |
| Positive | 119 (77.8) |  | 112 (81.2) | |  |
| **HER2 status*** |  |  |  | | **0.033** |
| Negative | 113 (73.9) |  | 82 (59.4) | |  |
| Positive | 34 (22.2) |  | 48 (34.8) | |  |
| **Ki67*** |  |  |  | | 0.272 |
| Low | 58 (37.9) |  | 45 (32.6) | |  |
| High | 35 (22.9) |  | 43 (31.2) | |  |
| Abbreviations: pT, pathological tumor size; pN, pathological lymph-node status; LVI, lymphovascular invasion; ER, estrogen receptor; PR, progesterone receptor; HER2, human epidermal growth factor receptor 2; | | | | | |
| *Excluded the unknown category. | | | | | |

| **Table S3. Univariate and multivariate Cox regression analyses of DFS in BC patients.** | | | | |  |
| --- | --- | --- | --- | --- | --- |
|  | **Univariate analysis** | |  | **Multivariate analysis** | |
| **Covariates** | **HR (95% CI)** | ***p*-value** |  | **HR (95% CI)** | ***p*-value** |
| **Age (years)** |  | 0.425 |  |  |  |
| **41-60 versus ≤40** | 0.648 (0.371-1.133) | 0.128 |  | —— |  |
| **>60 versus ≤40** | 0.596 (0.298-1.190) | 0.143 |  | —— |  |
| **Grade (G3 versus G1/2)** | 1.404 (0.837-2.355) | 0.199 |  | —— |  |
| **pT stage (T2/3 versus T1)** | 2.113 (1.166-3.828) | **0.014** |  | 1.668 (0.903-3.081) | 0.102 |
| **pN stage** |  | **<0.001** |  |  | **<0.001** |
| **N1 versus N0** | 2.477 (1.267-4.843) | **0.008** |  | 3.342 (1.570-7.113) | **0.002** |
| **N2 versus N0** | 2.861 (1.237-6.614) | **0.014** |  | 3.952 (1.553-10.057) | **0.004** |
| **N3 versus N0** | 5.276 (2.640-10.544) | **<0.001** |  | 7.757 (3.192-18.851) | **<0.001** |
| **LVI (positive versus negative)** | 2.011 (1.198-3.375) | **0.008** |  | 0.668 (0.345-1.291) | 0.230 |
| **ER (positive versus negative)** | 0.900 (0.526-1.539) | 0.700 |  | —— |  |
| **PR (positive versus negative)** | 0.769 (0.431-1.374) | 0.375 |  | —— |  |
| **HER2 (positive versus negative)** | 1.327 (0.761-2.314) | 0.319 |  | —— |  |
| **Ki67 (high versus low)** | 1.565 (0.854-2.869) | 0.147 |  | —— |  |
| **MSMO1 expression level (high versus low)** | 2.373 (1.416-3.976) | **0.001** |  | 2.683 (1.571-4.583) | **<0.001** |
| Abbreviations: DFS, disease-free survival; pT, pathological tumor size; pN, pathological lymph-node status; LVI, lymphovascular invasion; ER, estrogen receptor; PR, progesterone receptor; HER2, human epidermal growth factor receptor 2; HR, hazard ratio; CI, confidence interval. | | | | | |
